# Supplementary material
Source: PubMed Central journal article supplement (PMC3005969)
Supplement: NIHMS232394-supplement-01.pdf [file NIHMS232394-supplement-01.pdf]

## Supplemental Information

**Table S1.** Brief Psychiatric Rating Scale (BPRS) and Scale for Assessment of Negative Symptoms (SANS) scores for the subjects who participated in the imaging study.

|             | Placebo |      | DMXB-A 75 mg |      |             | DMXB-A 150 mg |      |             |
|-------------|---------|------|--------------|------|-------------|---------------|------|-------------|
|             | Mean    | SD   | Mean         | SD   | Effect Size | Mean          | SD   | Effect Size |
| <b>SANS</b> | 19.3    | 17.1 | 17.5         | 16.5 | 0.20        | 17.2          | 15.5 | 0.24        |
| <b>BPRS</b> | 27.8    | 9.7  | 26.8         | 7.5  | 0.17        | 26.2          | 6.7  | 0.20        |

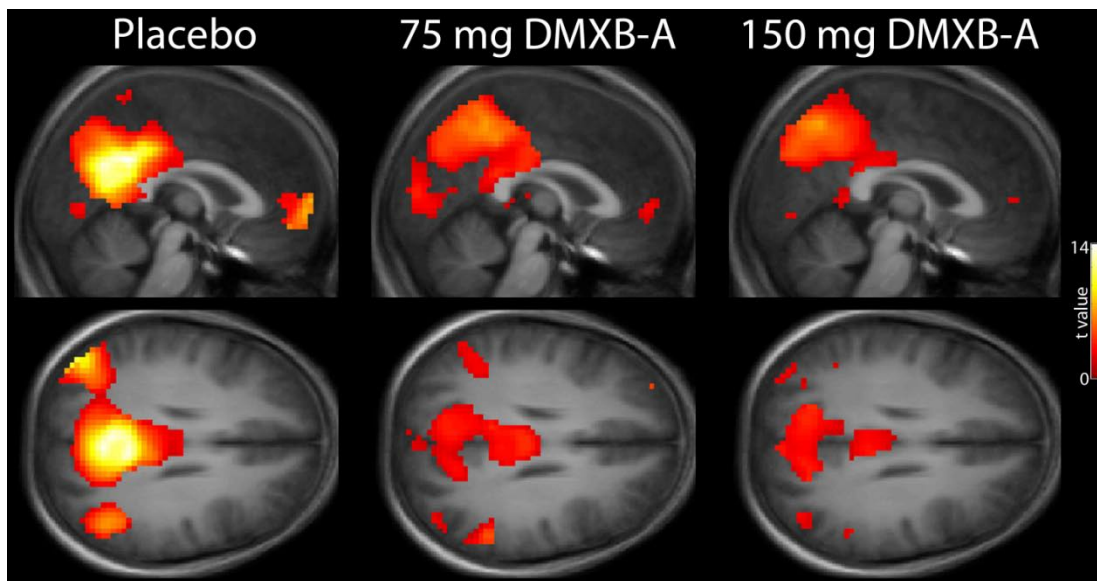**Figure S1.** Average default network activity for placebo, 75 mg DMXB-A and 150 mg DMXB-A conditions.
